# Supplementary material
Source: MDPI journal article supplement (https://www.mdpi.com/2673-947X/3/2/12)
Supplement: s1 [file s1]

# Supplementary Document S1. List of original articles included in the scoping review of bacterial contamination of antiseptics, disinfectants and products used for hand hygiene

## Outbreak reports

1. Archibald, L.K.; Shah, B.; Schulte, M.; Arduino, M.J.; Agüero, S.; Fisher, D.J.; Stechenberg, B.W.; Banerjee, S.N.; Jarvis, W.R. Serratia Marcescens Outbreak Associated with Extrinsic Contamination of 1% Chlorxylenol Soap. *Infect. Control Hosp. Epidemiol.* **1997**, *18*, 704–709. <https://doi.org/10.1086/647516>.
2. Bassett, D.C.J.; Stokes, K.J.; Thomas, W.R.G. Wound Infection with Pseudomonas Multivorans: A Water-Borne Contaminant of Disinfection Solutions. *Lancet* **1970**, 1188–1191. [https://doi.org/10.1016/S0140-6736\(70\)91783-6](https://doi.org/10.1016/S0140-6736(70)91783-6).
3. Buffet-Bataillon, S.; Rabier, V.; Bétrémieux, P.; Beuchée, A.; Bauer, M.; Pladys, P.; Le Gall, E.; Cormier, M.; Jolivet-Gougeon, A. Outbreak of Serratia Marcescens in a Neonatal Intensive Care Unit: Contaminated Unmedicated Liquid Soap and Risk Factors. *J. Hosp. Infect.* **2009**, *72*, 17–22. <https://doi.org/10.1016/j.jhin.2009.01.010>.
4. Cascio, G. Lo; Bonora, M.G.; Zorzi, A.; Mortani, E.; Tessitore, N.; Loschiavo, C.; Lupo, A.; Solbiati, M.; Fontana, R.; Patologia, D.; et al. A Napkin-Associated Outbreak of Burkholderia Cenocepacia Bacteraemia in Haemodialysis Patients. *J. Hosp. Infect.* **2006**, *64*, 56–62. <https://doi.org/10.1016/j.jhin.2006.04.010>.
5. Centers for Disease Control and Prevention, (CDC). Contaminated Detergent Solution. *Morb. Mortal. Wkly. Rep.* **1969**, *18*, 366.
6. Centers for Disease Control and Prevention, (CDC). Contamination of Alcohol Prep Pads with Bacillus Cereus Group and Bacillus Species — Colorado, 2010. *Morb. Mortal. Wkly. Rep.* **2011**, *60*, 347.
7. Centers for Disease Control and Prevention, (CDC). Epidemiologic Notes and Reports Pseudomonas Aeruginosa Peritonitis Attributed to a Contaminated Iodophor Solution -- Georgia. *Morb. Mortal. Wkly. Rep.* **1982**, *31*, 197–198.
8. Coyle-Gilchrist, M.M.; Crewe, P.; Roberts, G. Flavobacterium Meningosepticum in the Hospital Environment. *J. clin. Path.* **1976**, *29*, 824–826. <https://doi.org/10.1136/jcp.29.9.824>.
9. de Frutos, M.; Lopez-Urrutia, L.; Dominguez-Gil, M.; Arias, M.; Munoz-Bellido, J.L.; Eiros, J.M.; Ramos, C. Serratia Marcescens Outbreak Due to Contaminated 2% Aqueous Chlorhexidine. *Enferm. Infecc. Microbiol. Clin.* **2017**, *35*, 624–629. <https://doi.org/10.1016/j.eimc.2016.06.016>.
10. Dixon, R.E.; Kaslow, R.A.; Mackel, D.C.; Fulkerson, C.C.; Mallison, G.F. Aqueous Quaternary Ammoniums Antiseptics and Disinfectants Use and Misuse. *JAMA* **1976**, *236*, 2415–2417. <https://doi.org/10.1001/jama.1976.03270220035031>.
11. Dolan, S.A.; Littlehorn, C.; Glodé, M.P.; Dowell, E.; Xavier, K.; Nyquist, A.-C.; Todd, J.K. Association of Bacillus Cereus Infection with Contaminated Alcohol Prep Pads . *Infect. Control Hosp. Epidemiol.* **2012**, *33*, 666–671. <https://doi.org/10.1086/666334>.
12. Dulake, C.; Kidd, E. Contaminated Irrigating Fluid. *Lancet* **1966**, 980. [https://doi.org/10.1016/S0140-6736\(66\)90982-2](https://doi.org/10.1016/S0140-6736(66)90982-2).
13. Ehrenkranz, J.N.; Bolyard, E.A.; Wiener, M.; Clearry, T. Antibiotic-Sensitive Serratia Marcescens Infection Complicating Cardiopulmonary Operations: Contaminated Disinfectant as a Reservoir. *Lancet* **1980**, 1289–1291. [https://doi.org/10.1016/S0140-6736\(80\)92349-1](https://doi.org/10.1016/S0140-6736(80)92349-1).
14. Falkiner, F.R.; Jacoby, G.A.; Keane, C.T.; Mccann, S.R. Amikacin, Gentamicin and Tobramycin Resistant Pseudomonas Aeruginosa in a Leukaemic Ward . *Epidemiology and Genetic Studies. J. Hosp. Infect.* **1982**, *3*, 253–261. [https://doi.org/10.1016/0195-6701\(82\)90044-5](https://doi.org/10.1016/0195-6701(82)90044-5).
15. Fanci, R.; Bartolozzi, B.; Sergi, S.; Casalone, E.; Pecile, P.; Cecconi, D.; Mannino, R.; Donnarumma, F.; Leon, A.G.; Guidi, S.; et al. Molecular Epidemiological Investigation of an Outbreak of Pseudomonas Aeruginosa Infection in an SCT Unit. *Bone Marrow Transplant.* **2009**,

- 43, 335–338. <https://doi.org/10.1038/bmt.2008.319>.
16. Fernandez, A.L.; Adrio, B.; Cereijo, J.M.M.; Monzonis, M.A.M.; El-Diasty, M.M.; Escudero, J.A. Clinical Study of an Outbreak of Postoperative Mediastinitis Caused by *Serratia Marcescens* in Adult Cardiac Surgery. *Interact. Cardiovasc. Thorac. Surg.* **2020**, *30*, 523–527. <https://doi.org/10.1093/icvts/ivz312>.
  17. Frank, M.J.; Schaffner, W. Contaminated Aqueous Benzalkonium Chloride An Unnecessary Hospital Infection Hazard. *JAMA J. Am. Med. Assoc.* **1976**, *236*, 2418–2419. <https://doi.org/10.1001/jama.1976.03270220038032>.
  18. Garcia-Erce, J.A.; Grasa, J.M.; Solano, V.M.; Gimeno, J.J.; Lopez, A.; Hernandez, M.J.; Marcot, M.L.; L., A.J.; Giralt, M. Bacterial Contamination of Blood Components Due to *Burkholderia Cepacia* Contamination from Chlorhexidine Bottles. *Vox Sang.* **2002**, *83*, 70–71. <https://doi.org/10.1046/j.1423-0410.2002.00195.x>
  19. Grohskopf, L.; Roth, V.; Feikin, D.; Arduino, M.; Carson, L.; JI, T.; Holt, S.; Jensen, B.; Hoffman, R.; Jarvis, W. *Serratia Liquefaciens* Bloodstream Infections from Contamination of Epoetin Alfa at a Hemodialysis Center. *N. Engl. J. Med.* **2001**, *344*, 1491–1497. <https://doi.org/10.1056/NEJM200105173442001>.
  20. Grupo de estudio del brote Brote Por *Serratia Marcescens* Asociado a La Utilización de Un Antiséptico de Clorhexidina Contaminado. *Bol. Epidemiol. Semenal* **2016**, *24*, 85–101. <https://hdl.handle.net/20.500.12105/14134>
  21. Guinness, M.; Levey, J. Contamination of Aqueous Dilutions of Resiguard Disinfectant with *Pseudomonas*. *Med. J. Aust.* **1976**, 392.
  22. Hardy, P.C.; Ederer, G.M.; Mastsen, J.M. Contamination of Commercially Packaged Urinary Catheter Kits with *Pseudomonas* EO-1. *N. Engl. J. Med.* **1970**, *282*, 33–35. <https://doi.org/10.1056/NEJM197001012820108>.
  23. Heo, S.T.; Kim, S.J.; Jeong, Y.G.; Bae, I.G.; Jin, J.S.; Lee, J.C. Hospital Outbreak of *Burkholderia Stabilis* Bacteraemia Related to Contaminated Chlorhexidine in Haematological Malignancy Patients with Indwelling Catheters. *J. Hosp. Infect.* **2008**, *70*, 241–245. <https://doi.org/10.1016/j.jhin.2008.07.019>.
  24. Hervé, B.; Chomali, M.; Gutiérrez, C.; Luna, M.; Rivas, J.; Blamey, R. Brote de Infección Nosocomial Por *Serratia Marcescens* Asociado a Contaminación Intrínseca de Clorhexidina Acuosa. *Rev Chil. Infectol* **2015**, *32*, 517–522. <https://doi.org/10.4067/S0716-10182015000600004>.
  25. Hugon, E.; Marchandin, H.; Poirée, M.; Fosse, T.; Sirvent, N. *Achromobacter* Bacteraemia Outbreak in a Paediatric Onco-Haematology Department Related to Strain with High Surviving Ability in Contaminated Disinfectant Atomizers. *J. Hosp. Infect.* **2015**, *89*, 116–122. <https://doi.org/10.1016/j.jhin.2014.07.012>.
  26. Kahan, A.; Philippon, A.; Paul, G.; Weber, S.; Richard, C.; Hazebroucq, G.; Degeorges, M. Nosocomial Infection by Chlorhexidine Solution Contaminated with *Pseudomonas Pickettii* (Biovar VA - I). *J. Infect.* **1983**, *7*, 256–263. [https://doi.org/10.1016/S0163-4453\(83\)97196-7](https://doi.org/10.1016/S0163-4453(83)97196-7).
  27. Lanini, S.; D'Arezzo, S.; Puro, V.; Martini, L.; Imperi, F.; Piselli, P.; Montanaro, M.; Paoletti, S.; Visca, P.; Ippolito, G.; et al. Molecular Epidemiology of a *Pseudomonas Aeruginosa* Hospital Outbreak Driven by a Contaminated Disinfectant-Soap Dispenser. *PLoS One* **2011**, *6*, 1–10. <https://doi.org/10.1371/journal.pone.0017064>.
  28. Lee, C.S.; Lee, H.B.; Cho, Y.G.; Park, J.H.; Lee, H.S. Hospital-Acquired *Burkholderia Cepacia* Infection Related to Contaminated Benzalkonium Chloride. *Hosp. Infect. Soc.* **2008**, 280–282. <https://doi.org/10.1016/j.jhin.2007.11.016>.
  29. Lee, J.C.; Philip J, F. Benzalkonium Chloride - Source of Hospital Infection with Gram-Negative Bacteria. *JAMA J. Am. Med. Assoc.* **1961**, 144–145. <https://doi.org/10.1001/jama.1961.73040360013012a>.
  30. Lee, S.; Han, S.W.; Kim, G.; Song, D.Y.; Lee, J.C.; Kwon, K.T. An Outbreak of *Burkholderia Cenocepacia* Associated with Contaminated Chlorhexidine Solutions Prepared in the Hospital. *Am. J. Infect. Control* **2013**, *41*, 93–96. <https://doi.org/10.1016/j.ajic.2013.01.024>.

31. Lehours, P.; Rogues, A.M.; Occhialini, A.; Boulestreau, H.; Gachie, J.P.; Mégraud, F. Investigation of an Outbreak Due to *Alcaligenes xylosoxydans* Subspecies *xylosoxydans* by Random Amplified Polymorphic DNA Analysis. *Eur J Clin Microbiol Infect Dis* **2002**, *21*, 108–113. <https://doi.org/10.1007/s10096-001-0669-x>.
32. Malizia, W.F.; Gangarosa, E.J.; Goley, A.F. Benzalkonium Chloride as a Source of Infection. *N. Engl. J. Med.* **1960**, *263*, 800–802. <https://doi.org/10.1056/NEJM196010202631608>.
33. McAllister, T.A.; Lucas, C.E.; Mocan, H.; Liddell, R.H.A.; Gibson, B.E.S.; Hann, I.M.; Platt, D.J. *Serratia marcescens* Outbreak in a Paediatric Oncology Unit Traced to Contaminated Chlorhexidine. *Scott. Med. J.* **1989**, *34*, 525–528. <https://doi.org/10.1177/003693308903400506>.
34. McNaughton, M.; Mazinke, N.; Thomas, E. Newborn Conjunctivitis Associated with Triclosan 0.5% Antiseptic Intrinsically Contaminated with *Serratia marcescens*. *Can. J. Infect. Control* **1995**, *10*, 7–8.
35. Merino, J.L.; Bouarich, H.; Pita, M.J.; Martínez, P.; Bueno, B.; Caldés, S.; Corchete, E.; Jaldo, M.T.; Espejo, B.; Paraíso, V. *Serratia marcescens* Bacteraemia Outbreak in Haemodialysis Patients with Tunnelled Catheters Due to Colonisation of Antiseptic Solution. Experience at 4 Hospitals. *Nefrología* **2016**, *36*, 667–673. <https://doi.org/10.1016/j.nefro.2016.05.009>.
36. Mitchell, R.G.; Oxon, B.; Hayward, A. Not Always , Effectively Maintained by a Collateral Despite Chloramphenicol Therapy , the Organism Persisted in the Urine for a Time But. *Lancet* **1966**, 793–795. [https://doi.org/10.1016/S0140-6736\(66\)91866-6](https://doi.org/10.1016/S0140-6736(66)91866-6)
37. Molina-Cabrillana, J.; Santana-Reyes, C.; González-García, A.; Bordes-Benítez, A.; Horcajada, I. Outbreak of *Achromobacter xylosoxidans* Pseudobacteremia in a Neonatal Care Unit Related to Contaminated Chlorhexidine Solution. *Eur. J. Clin. Microbiol. Infect. Dis.* **2007**, *26*, 435–437. <https://doi.org/10.1007/s10096-007-0311-7>.
38. Morillo, A.; Torres, M.J.; Salas, M.T.A.; Conde, M.; Aznar, J.Y. Implicación de Un Brote Nacional de Infección Por *Serratia marcescens* Asociado a Clorhexidina Contaminada En Un Hospital Pediátrico Implication of a National Outbreak of *Serratia marcescens* Associated with a Contaminated Solution of Chlorhexidine in a Pae. *Cart. Cient.* **2017**, 171–172. <https://doi.org/10.1016/j.anpedi.2017.04.007>
39. Morris, S.; Gibbs, M.; Hansman, D.; Smyth, N.; Morris S, Gibbs M, Hansman DH, Smyth N, C.D. Contamination of Aqueous Dilutions of Resiguard Disinfectant with *Pseudomonas*. *1The Med. J. Aust.* **1976**, 110–111.
40. Nakashima, A.K.; McCarthy, M.A.; Martone, W.J.; Anderson, R.L. Epidemic Septic Arthritis Caused by *Serratia marcescens* and Associated with a Benzalkonium Chloride Antiseptic. *J. Clin. Microbiol.* **1987**, *25*, 1014–1018. <https://doi.org/10.1128/jcm.25.6.1014-1018.1987>.
41. Noone, P.; Shafi, M.S. Controlling Infection in a District General Hospital. *J. Clin. Pathol.* **1973**, *26*, 140–145. <https://doi.org/10.1136/jcp.26.2.140>.
42. Oie, S.; Arakawa, J.; Furukawa, H.; Matsumoto, S.; Matsuda, N.; Wakamatsu, H. Microbial Contamination of a Disinfectant-Soaked Unwoven Cleaning Cloth. *J. Hosp. Infect.* **2012**, *82*, 61–63. <https://doi.org/10.1016/j.jhin.2012.06.010>.
43. Olson, R.K.; Voorhees, R.E.; Eitzen, H.E.; Rolka, H.; Sewell, C.M. Cluster of Postinjection Abscesses Related to Corticosteroid Injections and Use of Benzalkonium Chloride. *West. J. Med.* **1999**, *170*, 143–147.
44. Panlilio, A.L.; Beck-Sague, C.M.; Siegel, J.D.; Anderson, R.L.; Yetts, S.Y.; Clark, N.C.; Duer, P.N.; Thomassen, K.A.; Vess, R.W.; Hill, B.C.; et al. Infections and Pseudoinfections Due to Povidone-Iodine Solution Contaminated with *Pseudomonas cepacia*. *Clin. Infect. Dis.* **1992**, *14*, 1078–1083. <https://doi.org/10.1093/clinids/14.5.1078>.
45. Parrott, P.L.; Terry, P.M.; Whitworth, E.N.; Frawley, L.W.; Coble, R.S. *Pseudomonas aeruginosa* Peritonitis Associated with Contaminated Poloxamer-Iodine Solution. *Lancet* **1982**, *25*, 683–685. [https://doi.org/10.1016/s0140-6736\(82\)90712-7](https://doi.org/10.1016/s0140-6736(82)90712-7).
46. Plotkin, S.; Austrian, R. Bacteremia Caused by *Pseudomonas* Sp. Following the Use of Materials Stored in Solutions of a Cationic Surface-Active Agent. *Am. J. Med. Sci.* **1958**, 621–

627. <https://doi.org/10.1097/00000441-195806000-00001>.
47. Poty, F.; Denis, C.; Baufine-Ducrocq, H. Infection Nosocomiale à *Pseudomonas Pickettii*. Danger de l'utilisation Des Résines Échangeuses d'ions. *Presse Med.* **2008**, *16*, 1185–1187.
  48. Rabier, V.; Bataillon, S.; Jolivet-Gougeon, A.; Chapplain, J.M.; Beuchée, A.; Bétrémieux, P. Hand Washing Soap as a Source of Neonatal *Serratia Marcescens* Outbreak. *Acta Paediatr.* **2008**, *97*, 1381–1385. <https://doi.org/10.1111/j.1651-2227.2008.00953.x>.
  49. Romero-Gomez, M.P.; Quiles-Melero, M.I.; Garcia, P.P.; Altes, G.A.; Garcia de Miguel, M.A.; Jimenez, C.; Valdezate, S.; Nieto, S.; Romero-Gómez, M.P.; Quiles-Melero, M.I.; et al. Outbreak of *Burkholderia Cepacia* Bacteremia Caused by Contaminated Chlorhexidine in a Hemodialysis Unit. *Infect. Control Hosp. Epidemiol.* **2008**, *229*, 377–378. <https://doi.org/10.1086/529032>.
  50. Rudnick, J.R.; Beck-Sague, C.M.; Anderson, R.L.; Schable, B.; Miller, M.J. Gram-Negative Bacteremia in Open-Heart-Surgery Patients Traced to Probable Tap-Water Contamination of Pressure-Monitoring Equipment. *Infect. Control Hosp. Epidemiol.* **1996**, *17*, 281–285. <https://doi.org/10.1086/647296>.
  51. Sartor, C.; Jacomo, V.; Duvivier, C.; Tissot-Dupont, H.; Sambuc, R.; Drancourt, M. Nosocomial *Serratia Marcescens* Infections Associated with Extrinsic Contamination of a Liquid Nonmedicated Soap. *Infect Control Hosp Epidemiol* **2000**, *21*, 196–199. <https://doi.org/10.1086/501743>.
  52. Sautter, R.L.; Mattman, L.H.; Legaspi, R.C.; Control, S.I.; May, N.; Sautter, R.L.; Mattman, L.H.; Legaspi, R.C. Associated With a Contaminated Benzalkonium Chloride Solution *Serratia Marcescens* Meningitis. **2020**, *5*, 223–225. <https://doi.org/10.1017/S019594170006015X>.
  53. Shickman, M.D.; Guze, L.B.; Pearge, M.L. Bacteremia Following Cardiac Catheterization: Report of a Case and Studies on the Source. *N. Engl. J. Med.* **1959**, *260*, 1164–1166. <https://doi.org/10.1056/NEJM195906042602304>.
  54. Shigeta, S.; Yasunaga, Y.; Honzumi, K.; Okamura, H.; Kumata, R.; Endo, S. Cerebral Ventriculitis Associated with *Achromobacter Xylosoxidans*. *J. Clin. Pathol.* **1978**, *31*, 156–161. <https://doi.org/10.1136/jcp.31.2.156>.
  55. Sobel, J.D.; Hashman, N.; Reinherz, G.; Merzbach, D. Nosocomial *Pseudomonas Cepacia* Infection Associated with Chlorhexidine Contamination. *Am. J. Med.* **1982**, *73*, 183–186. [https://doi.org/10.1016/0002-9343\(82\)90176-0](https://doi.org/10.1016/0002-9343(82)90176-0).
  56. Speller, D.C.E.; Stephens, M.E.; Viant, A.C. Hospital Infection by *Pseudomonas Cepacia*. *Lancet* **1971**, 798–799. [https://doi.org/10.1016/s0140-6736\(71\)91236-0](https://doi.org/10.1016/s0140-6736(71)91236-0).
  57. Stirland, R.M.; Tooth, J.A. *Pseudomonas Cepacia* as Contaminant of Propamidine Disinfectants. *Br. Med. J.* **1976**, 1505. <https://doi.org/10.1136/bmj.2.6050.1505-a>.
  58. Süer, K.; Meryem, G.; Oflu, B.B.; Tunç, E.; Güvenir, M.; Oflu, B.B.; Tunç, E. Outbreak of *Burkholderia Cepacia* Complex Associated with Contaminated Liquid Soap for Hospital Use: A Case Study. *African J. Microbiol. Res.* **2016**, *10*, 791–795. <https://doi.org/10.5897/ajmr2015.7661>.
  59. Takahashi, H.; Kramer, M.H.; Yasui, Y.; Fujii, H.; Nakase, K.; Ikeda, K.; Imai, T.; Okazawa, A.; Tanaka, T.; Ohyanna, T.; et al. Nosocomial *Serratia Marcescens* Outbreak in Osaka, Japan, From 1999 to 2000. *Infect. Control Hosp. Epidemiol.* **2004**, *25*, 156–161. <https://doi.org/10.1086/502367>.
  60. Tena, D.; Carranza, R.; Barberá, J.R.; Valdezate, S.; Garrancho, J.M.; Arranz, M.; Sáez-Nieto, J.A. Outbreak of Long-Term Intravascular Catheter-Related Bacteremia Due to *Achromobacter Xylosoxidans* Subspecies *Xylosoxidans* in a Hemodialysis Unit. *Eur. J. Clin. Microbiol. Infect. Dis.* **2005**, *24*, 727–732. <https://doi.org/10.1007/s10096-005-0028-4>.
  61. Tiwari, T.S.P.; Ray, B.; Jost, K.C.; Rathod, M.K.; Zhang, Y.; Brown-Elliott, B.A.; Hendricks, K.; Wallace, R.J. Forty Years of Disinfectant Failure: Outbreak of Postinjection *Mycobacterium Abscessus* Infection Caused by Contamination of Benzalkonium Chloride. *Clin. Infect. Dis.* **2003**, *36*, 954–962. <https://doi.org/10.1086/368192>.

62. Vigeant, P.; Loo, V.G.; Bertrand, C.; Dixon, C.; Hollis, R.; Pfaller, M.A.; McLean, P.A.H.; Briedis, D.J.; Perl, T.M.; Robson, H.G. An Outbreak of *Serratia Marcescens* Infections Related to Contaminated Chlorhexidine. *Infect. Control Hosp. Epidemiol.* **1998**, *19*, 791–794. <https://doi.org/10.1086/647728>.
63. Villari, P.; Crispino, M.; Salvadori, A.; Scarcella, A. Molecular Epidemiology of an Outbreak of *Serratia Marcescens* in a Neonatal Intensive Care Unit. *Infect. Control Hosp. Epidemiol.* **2001**, *22*, 630–634. <https://doi.org/10.1086/501834>.
64. Vu-Thien, H.; Darbord, J.C.; Moissenet, D.; Dulot, C.; Dufourcq, J.B.; Marsol, P.; Garbarg-Chenon, A. Investigation of an Outbreak of Wound Infections Due to *Alcaligenes Xylosoxidans* Transmitted by Chlorhexidine in a Burns Unit. *Eur J Clin Microbiol Infect Dis* **1998**, *17*, 724–726. <https://doi.org/10.1007/s100960050168>.
65. Wishart, M.M.; Riley, T. V. Infection with *Pseudomonas Matophilia* Hospital Outbreak Due to Contaminated Disinfectant. *Med. J. Aust.* **1976**, 710–712. <https://doi.org/10.5694/j.1326-5377.1976.tb128238.x>.
66. Wong, S.C.Y.; Wong, S.; Chen, J.H.K.; Poon, R.W.S.; Hung, D.L.L.; Chiu, K.H.Y.; So, S.Y.C.; Leung, W.S.; Chan, T.M.; Yap, D.Y.H.; et al. Complex Outbreak in Peritoneal Dialysis Patients Caused by Contaminated Aqueous Chlorhexidine. *Emerg. Infect. Dis.* **2020**, *26*, 1987–1997. <https://doi.org/10.3201/eid2609.191746>.
67. Gleeson, S.; Mulroy, E.; Bryce, E.; Fox, S.; Taylor, S.L.; Talreja, H. *Burkholderia Cepacia*: An Outbreak in the Peritoneal Dialysis Unit. *Perit. Dial. Int.* **2019**, *39*, 92–95. <https://doi.org/10.3747/pdi.2018.00095>.
68. Hocevar, S.N.; Meites, E.; Williams, M.; Pascoe, N.; O'Connell, H.; Jensen, B.; Hatch, M.; MacCannell, T. Allergy Injection-Associated *Mycobacterium Abscessus* Outbreak, Texas, 2009. *Infect. Dis. Soc. Am.* **2010**, *48*, 109–110.

### Pseudo-outbreak reports

1. Berger, S.A. Pseudobacteremia Due to Contaminated Alcohol Swabs. *J. Clin. Microbiol.* **1983**, *18*, 974–975. <https://doi.org/10.1128/jcm.18.4.974-975.1983>.
2. Berkelman, R.L.; Lewin, S.; Allen, J.R.; Anderson, R.L.; Budnick, L.D.; Shapiro, S.; Friedman, S.M.; Nicholas, P.; Holizman, R.S.; Haley, R.W. Pseudobacteremia Attributed to Contamination of Povidone-Iodine with *Pseudomonas Cepacia*. *Ann. Intern. Med.* **1981**, *95*, 32–36. <https://doi.org/10.1086/647296>.
3. Craven, D.E.; Moody, B.; Connolly, M.G.; Kollisch, N.R.; Stottmeier, K.D.; McCabe, W.R. Pseudobacteremia Caused by Povidone-Iodine Solution Contaminated with *Pseudomonas Cepacia*. *Syria Stud.* **1981**, *305*, 621–623. <https://doi.org/10.1056/NEJM198109103051106>.
4. Ebner, W.; Meyer, E.; Schulz-Huotari, C.; Scholz, R.; Zilow, G.; Daschner, F.D.; Schulz-Huotari, C.; Scholz, R.; Zilow, G.; Daschner, F.D. Pseudocontamination of Blood Components with *Burkholderia Cepacia* during Quality Controls. *Transfus. Med.* **2005**, *15*, 241–242. <https://doi.org/10.1111/j.1365-3148.2005.00577.x>.
5. Gosden, P.; Norman, P. Pseudobacteremia Associated with Contaminated Skin Cleaning Agent. *Lancet* **1985**, 671–672. [https://doi.org/10.1016/S0140-6736\(85\)90039-X](https://doi.org/10.1016/S0140-6736(85)90039-X).
6. Hsueh, P.; Teng, L.; Yang, P.; Pan, H.; Ho, S. Nosocomial Pseudoepidemic Caused by *Bacillus Cereus* Traced to Contaminated Ethyl Alcohol from a Liquor Factory. *J. Clin. Microbiol.* **1999**, *37*, 2280–2284. <https://doi.org/10.1128/JCM.37.7.2280-2284.1999>.
7. Kaslow, R.A.; Mackel, D.C.; Mallison, G.F. Nosocomial Pseudobacteremia: Positive Blood Cultures Due to Contaminated Benzalkonium Antiseptic. *JAMA* **1976**, *236*, 2407–2409. <https://doi.org/10.1001/jama.236.21.2407>.
8. Ko, S.; Rn, H.A.; Hwan, J.; Park, S. American Journal of Infection Control An Outbreak of *Burkholderia Cepacia* Complex Pseudobacteremia Associated with Intrinsically Contaminated Commercial 0.5 % Chlorhexidine Solution. *Am. J. Infect. Control* **2015**, *43*, 266–

268. <https://doi.org/10.1016/j.ajic.2014.11.010>.
9. Maroye, P.; Doermann, H.P.; Rogues, A.M.; Gachie, J.P.; Mégraud, F. Investigation of an Outbreak of *Ralstonia Pickettii* in a Paediatric Hospital by RAPD. *J. Hosp. Infect.* **2000**, *44*, 267–272. <https://doi.org/10.1053/jhin.1999.0691>.
  10. Serikawa, T.; Kobayashi, S.; Tamura, T.; Uchiyama, M.; Tsukada, H.; Takakuwa, K.; Tanaka, K.; Ito, M. Pseudo Outbreak of *Burkholderia Cepacia* in Vaginal Cultures and Intervention by Infection Control Team. *J. Hosp. Infect.* **2010**, *75*, 242–243. <https://doi.org/10.1016/j.jhin.2009.11.013>.
  11. Siebor, E.; Llanes, C.; Lafon, I.; Ogier-Desserrey, A.; Duez, J.M.; Pechinot, A.; Caillot, D.; Grandjean, M.; Sixt, N.; Neuwirth, C. Presumed Pseudobacteremia Outbreak Resulting from Contamination of Proportional Disinfectant Dispenser. *Eur J Clin Microbiol Infect Dis* **2006**, *26*, 195–198. <https://doi.org/10.1007/s10096-007-0260-1>.
  12. Song, J.E.; Kwak, Y.G.; Um, T.H.; Cho, C.R.; Kim, S.; Park, I.S.; Hwang, J.H.; Kim, N.; Oh, G.-B. Outbreak of *Burkholderia Cepacia* Pseudobacteremia Caused by Intrinsically Contaminated Commercial 0.5% Chlorhexidine Solution in Neonatal Intensive Care Units. *J. Hosp. Infect.* **2018**, *98*, 295–299. <https://doi.org/10.1016/j.jhin.2017.09.012>.
  13. Verschraegen, G.; Claeys, G.; Meeus, G.; Delanghe, M. *Pseudomonas Pickettii* as a Cause of Pseudobacteremia. *J. Clin. Microbiol.* **1985**, *21*, 278–279. <https://doi.org/10.1128/jcm.21.2.278-279.1985>.

#### Cross-sectional

1. Anderson, K. The Contamination of Hexachlorophene Soap with *Pseudomonas Pyocyanea*. *Med. J. Aust.* **1962**, 463. <https://doi.org/10.5694/j.1326-5377.1962.tb20451.x>.
2. Anderson, K.; Keynes, R. Infected Cork Closures and the Apparent Survival of Organisms in Antiseptic Solutions. *Br. Med. J.* **1958**, 274–275. <https://doi.org/10.1136/bmj.2.5091.274>.
3. Baird, R.M.; Shooter, R.A. *Pseudomonas Aeruginosa* Infections Associated with Use of Contaminated Medicaments. *Br. Med. J.* **1976**, *2*, 349–350. <https://doi.org/10.1136/bmj.2.6031.349>.
4. Barry, M.A.; Craven, D.E.; Goularte, T.A.; Lichtenberg, D.A. *Serratia Marcescens* Contamination of Antiseptic Soap Containing Triclosan: Implications for Nosocomial Infection. *Infect. Control* **1984**, *5*, 427–430. <https://doi.org/10.1017/s0195941700060690>.
5. Blanc, D.S.; Magalhaes, G.B.; Abdelbary, M.; Prod'homme, G.; Greub, G.; Wasserfallen, J.B.; Genoud, P.; Zanetti, G.; Senn, L. Hand Soap Contamination by *Pseudomonas Aeruginosa* in a Tertiary Care Hospital: No Evidence of Impact on Patients. *J. Hosp. Infect.* **2016**, *93*, 63–67. <https://doi.org/10.1016/j.jhin.2016.02.010>.
6. Boyce, J.M.; Havill, N.L. In-Use Contamination of a Hospital-Grade Disinfectant. *Am. J. Infect. Control* **2022**, *000*, 1–6. <https://doi.org/10.1016/j.ajic.2022.03.008>.
7. Brooks, S.E.; Walczak, M.A.; Malcom, S.; Hameed, R. Intrinsic *Klebsiella Pneumoniae* Contamination of Liquid Germicidal Hand Soap Containing Chlorhexidine. *Infect. Control Hosp. Epidemiol.* **2004**, *25*, 883–885. <https://doi.org/10.1086/502314>.
8. Bruun, J.N.; Digraanes, A. Survival of Gram-Negative Bacilli and *Candida Albicans* in Hexachlorophene Preparations and Other Disinfectants. *Scand J Infect Dis* **1971**, *3*, 235–238. <https://doi.org/10.3109/inf.1971.3.issue-3.10>.
9. Burdon, D.W.; Whitby, J.L.; Whitby, J.L. Contamination of Hospital Disinfectants with *Pseudomonas* Species. *Br. Med. J.* **1967**, *2*, 153–155. <https://doi.org/10.1136/bmj.2.5545.153>.
10. Cragg, J.; Andrews, A. V Bacterial Contamination of Disinfectant. *Br. Med. J.* **1969**, 57. <https://doi.org/10.1136/bmj.3.5661.57>.
11. D'Errico, M.M.; Savini, S.; Prospero, E.; Annino, I. Report on a Packaged Handwashing Antiseptic Contaminated With *Pseudomonas Aeruginosa*. *Infect. Control Hosp. Epidemiol.* **2000**, *21*, 302. <https://doi.org/10.1086/503222>.
12. Dieckmann, R.; Hammerl, J.A.; Hahmann, H.; Wicke, A.; Kleta, S.; Dabrowski, P.W.; Nitsche, A.; Stämmler, M.; Al Dahouk, S.; Lasch, P. Rapid Characterisation of: *Klebsiella Oxytoca*

- Isolates from Contaminated Liquid Hand Soap Using Mass Spectrometry, FTIR and Raman Spectroscopy. *R. Soc. Chem.* **2016**, 187, 353–375. <https://doi.org/10.1039/c5fd00165j>.
13. Dott, W.; Exner, M.; Krizek, L. Identification of Bacteria from Use-Surface Disinfectant Solutions and Their Sensibility against Disinfectants. *Zbl Bakt Hyg* **1981**, 174, 314–324.
  14. Dunkelberg, H.; Peeiffer, E.; Werner, H.; Wittig, J. Hygienic and Bacteriological Comparative Studies in 50 Hospitals IV. The Bacterial Contamination of Fluids of Intensive Care Units, Wards for Premature Children and New-Born Wards. *Zbl Bakt Hyg* **1976**, 161, 417–426.
  15. Elliot, B.; Maters, P. Pseudomonas Contamination of Antiseptic/Disinfectant Solutions. *Med. J. Aust.* **1977**, 155–156. <https://doi.org/10.5694/j.1326-5377.1977.tb130579.x>.
  16. Garcí'a-San Miguel, L.; Saez-Nieto, J.; Medina, M.J.; Lopez Hernandez, S.; Sanchez-Romero, I.; Ganga, B.; Asensio, A. Contamination of Liquid Soap for Hospital Use with Raoultella Planticola. *J. Hosp. Infect.* **2014**, 86, 219–220. <https://doi.org/10.1016/j.jhin.2013.10.009>.
  17. Gräf, W.; Kersch, D.; Scherzer, G. Microbial Contamination of Liquid-Soap Wall Dispensers with One-Way Bottles. *Zentralbl Bakteriell Mikrobiol Hyg B Umweltthyg Krankenhaushyg Arbeitshy Prax Med* **1988**, 186, 166–179.
  18. Hakuno, H.; Yamamoto, M.; Oie, S.; Kamiya, A. Microbial Contamination of Disinfectants Used for Intermittent Self - Catheterization. *Jpn. J. Infect. Dis.* **2010**, 63, 277–279. <https://doi.org/10.1056/NEJM197001012820108>.
  19. Jarvis, J.D.; Wynne, C.D.; Enwright, L.; Williams, J.D. Handwashing and Antiseptic-Containing Soaps in Hospital. *J. Clin. Pathol.* **1979**, 32, 732–737. <https://doi.org/10.1136/jcp.32.7.732>.
  20. Kampf, G.; Degenhardt, S.; Lackner, S.; Jesse, K.; von Baum, H.; Ostermeyer, C.; Baum, H. von; Ostermeyer, C. Poorly Processed Reusable Surface Disinfection Tissue Dispensers May Be a Source of Infection. *BMC Infect. Dis.* **2014**, 14, 1–8. <https://doi.org/10.1186/1471-2334-14-37>.
  21. Kupfahl, C.; Walter, M.; Wendt, C.; Baum, H. von; Kupfah, C.; Walther, M.; Wendt, C.; Baum, H. von Identical Achromobacter Strain in Reusable Surface Disinfection Tissue Dispensers and a Clinical Isolate a Ck n Ow Le d g m e n t S. *Infect. Control Hosp. Epidemiol.* **2015**, 36, 1362–1364. <https://doi.org/10.1017/ice.2015.169>.
  22. Leigh, D.; Whittaker, C. Disinfectants and Plastic Mop Heads. *Br. Med. J.* **1967**, 435.
  23. Lowbury, E.J.L. Contamination of Cetrimide and Other Fluids with Pseudomonas Pyocyanea. *Br. J. Ind. Med.* **1951**, 8, 22–25. <https://doi.org/10.1136/oem.8.1.22>.
  24. Marrie, T.J.; Costerton, J.W. Prolonged Survival of Serratia Marcescens in Chlorhexidine. *Appl. Environ. Microbiol.* **1981**, 42, 1093–1102. <https://doi.org/10.1128/aem.42.6.1093-1102.1981>.
  25. McBride, M.E. Microbial Flora of In-Use Soap Products. *Appl. Environ. Microbiol.* **1984**, 48, 338–341. <https://doi.org/10.1128/aem.48.2.338-341.1984>.
  26. Momeni, S.S.; Tomlin, N.; Ruby, J.D. Isolation of Raoultella Planticola from Refillable Antimicrobial Liquid Soap Dispensers in a Dental Setting. *J Am Dent Assoc.* **2015**, 146, 241–245. <https://doi.org/10.1016/j.adaj.2014.12.013>. Isolation.
  27. Newman, K.A.; Tenney, J.H.; Oken, H.A.; Moody, M.R.; Wharton, R.; Schimpff, S.C. Persistent Isolation of an Unusual Pseudomonas Species From a Phenolic Disinfectant System. *Infect. Control* **1984**, 5, 219–222. <https://doi.org/10.1017/s0195941700060148>.
  28. Nkibiassala, S.; Devleeschouwer, M.; Ganssbeke, V.B.; Rost, F.; Dony, J. Disinfectants Prepared in a Hospital Pharmacy - Assessment of Their Microbiological Purity and Antimicrobial Effectiveness. *J. Clin. Pharm. Ther.* **1989**, 14, 465–473. <https://doi.org/10.1111/j.1365-2710.1989.tb00271.x>.
  29. Oie, S.; Kamiya, A. Microbial Contamination of Antiseptic-Soaked Cotton Balls. *Biol. Pharm. Bull.* **1997**, 20, 667–669. <https://doi.org/10.1248/bpb.20.667>.
  30. Oie, S.; Kamiya, A. Microbial Contamination of Antiseptics and Disinfectants. *Am. J. Infect. Control* **1996**, 24, 389–395. [https://doi.org/10.1016/S0196-6553\(96\)90027-9](https://doi.org/10.1016/S0196-6553(96)90027-9).
  31. Palmer, P.; McCracken, L. Contaminated Antiseptic Solutions. *Lancet* **1970**, 2, 776–777. [https://doi.org/10.1016/S0140-6736\(70\)90256-4](https://doi.org/10.1016/S0140-6736(70)90256-4)

32. Prince, J.; Ayliffe, G.A.J. In-Use Testing of Disinfectants in Hospitals. *J. clin. Path.* **1972**, *25*, 586–589. <https://doi.org/10.1136/jcp.25.7.586>
33. Simmons, N.A.; Gardner, D.A. Bacterial Contamination of a Phenolic Disinfectant. *Br. Med. J.* **1969**, 668–669. <https://doi.org/10.1136/bmj.2.5658.668>.
