# Supplementary material
Source: MDPI journal article supplement (https://www.mdpi.com/2673-947X/3/2/12)
Supplement: s1 [file s1]

**Supplementary Table S1.** Search strategy of PubMed database

| Concept = #        | Search                                                                                                                                                                                                                                                                                                                                                                                                                                                                                                                                                                                                                                                                                                                                                                                                                                                                                                                                                                                                                                                                                                                                                                                                                                                                                                                                                                         |
|--------------------|--------------------------------------------------------------------------------------------------------------------------------------------------------------------------------------------------------------------------------------------------------------------------------------------------------------------------------------------------------------------------------------------------------------------------------------------------------------------------------------------------------------------------------------------------------------------------------------------------------------------------------------------------------------------------------------------------------------------------------------------------------------------------------------------------------------------------------------------------------------------------------------------------------------------------------------------------------------------------------------------------------------------------------------------------------------------------------------------------------------------------------------------------------------------------------------------------------------------------------------------------------------------------------------------------------------------------------------------------------------------------------|
| AS/DI/HH/Soap = #1 | "Biocide"[Tiab] OR "Germicide"[Tiab] OR "Sanitizer"[Tiab] OR "Cleanser"[Tiab] OR "Cleaning solution"[Tiab] OR "Cleaning product"[Tiab] OR "Cleaning solution"[Tiab]                                                                                                                                                                                                                                                                                                                                                                                                                                                                                                                                                                                                                                                                                                                                                                                                                                                                                                                                                                                                                                                                                                                                                                                                            |
| Disinfectant = #2  | "Disinfectant"[Mesh] OR "Disinfectant"[Tiab] OR "Desinfectant"[Tiab] OR "Chlorine"[Mesh] OR "Chlorine"[Tiab] OR "Javel"[Tiab] OR "Dakin"[Tiab] OR "Bleach"[Tiab] OR "Chlorine-releasing agent"[Tiab] OR "Chlorine-releasing compound"[Tiab] OR "Sodium hypochlorite"[Mesh] OR "Sodium hypochlorite"[Tiab] OR "Hypochlorure de sodium"[Tiab] OR "Chlorine compounds"[Mesh] OR "Chlorine compounds"[Tiab] OR "Dettol"[Tiab] OR "Printol"[Tiab] OR "chloroxylenol"[Mesh] OR "chloroxylenol"[Tiab] OR "para-chloro-meta-xylenol"[Tiab] OR "PCMX"[Tiab] OR "Cetrimide"[Tiab] OR "Cetrimonium"[Mesh] OR "Cetrimonium"[Tiab] OR "Quaternary Ammonium Compounds"[Mesh] OR "Quaternary Ammonium Compounds"[Tiab] OR "QAC"[Tiab] OR "Benzalkonium chloride"[Tiab] OR "Benzethonium chloride"[Tiab] OR "Benzalkonium compounds"[Mesh] OR "Benzalkonium compounds"[Tiab] OR "Didecylmethyl ammonium chloride"[Tiab] OR "DDAC"[Tiab] OR "Chloramines"[Mesh] OR "Chloramines"[Tiab] OR "Glutaraldehyde"[Tiab] OR "Glutaral"[Mesh] OR "Glutaral"[Tiab] OR "Formaldehyde"[Mesh] OR "Formaldehyde"[Tiab] OR "Formol"[Tiab] OR "Triclosan"[Mesh] OR "Triclosan"[Tiab] OR "Hexachlorophene"[Mesh] OR "Hexachlorophene"[Tiab] OR "Hydrogen peroxide"[Mesh] OR "Hydrogen peroxide"[Tiab] OR "Solubacter"[Tiab] OR "Triclocarban"[Mesh] OR "Triclocarban"[Tiab] OR Phenol[Mesh] OR "Bisphenol"[Tiab] |
| Antiseptic = #3    | "Antiseptic"[Mesh] OR "Antiseptic"[Tiab] OR "Anti-infective agents, local"[Mesh] OR "Anti-infective agents"[Mesh] OR "Anti-infective agents"[Tiab] OR "Ethanol"[Mesh] OR "Ethanol"[Tiab] OR "Alcohol"[Tiab] OR "Alcohols"[Mesh] OR "Alcohols"[Tiab] OR "2-Propanol"[Mesh] OR "2-Propanol"[Tiab] OR "Isopropylalcohol"[Tiab] OR "Iso-propyl alcohol"[Tiab] OR "Ethyl-alcohol"[Tiab] OR "Isopropanol"[Tiab] OR "Isopropyl alcohol"[Tiab] OR "Biguanide"[Tiab] OR "Chlorhexidine"[Mesh] OR "Chlorhexidine"[Tiab] OR "Chlorhexidine"[Tiab] OR "Chlorhexidin"[Tiab] OR "Clorhexidine"[Tiab] OR "Povidone iodine"[Tiab] OR "Povidone-iodine"[Mesh] OR "Povidone-iodine"[Tiab] OR "Isobetadine"[Tiab] OR "Iso-Betadine"[Tiab] OR "Iodophors"[Mesh] OR "Iodophors"[Tiab] OR "Iodophor"[Tiab] OR "Povidone"[Tiab] OR "Iodine"[Tiab] OR "Alcohol-based handrub"[Tiab] OR "Handrub"[Tiab] OR "Hand rub"[Tiab] OR "Alcogel"[Tiab]                                                                                                                                                                                                                                                                                                                                                                                                                                                          |
| HH/Soap = #4       | "Hand hygiene"[Mesh] OR "Hand hygiene"[Tiab] OR "Hand lotion"[Tiab] OR "Hand sanitizers"[Mesh] OR "Hand sanitizers"[Tiab] OR "Modified Dakin's solution"[Mesh] OR "Modified Dakin's solution"[Tiab] OR Soap*[Tiab] OR Soaps[Mesh] OR Detergents[Mesh] OR Detergent*[Tiab]                                                                                                                                                                                                                                                                                                                                                                                                                                                                                                                                                                                                                                                                                                                                                                                                                                                                                                                                                                                                                                                                                                      |
| Bacterial = #5     | "Bacteria"[Mesh] OR Bacteria*[Tiab] OR "Biofilms"[Mesh] OR "Biofilms"[Tiab] OR Spores[Mesh] OR Spores[Tiab] OR "Gram-negative bacteria"[Mesh] OR "Gram-negative bacteria"[Tiab] OR "Gram-positive bacteria"[Mesh] OR "Gram-positive bacteria"[Tiab] OR "Gramnegative"[Tiab] OR "Grampositive"[Tiab] OR "Gram negative"[Tiab] OR "Gram positive"[Tiab] OR "Acinetobacter"[Tiab] OR "Achromobacter"[Tiab] OR "Alcaligenes"[Tiab] OR "Burkholderia"[Tiab] OR "Bacillus"[Tiab] OR "Clostridium"[Tiab] OR "Klebsiella"[Tiab] OR "Escherichia"[Tiab] OR "Enterobacter"[Tiab] OR "Flavobacterium"[Tiab] OR "Methylobacterium"[Tiab] OR "Mycobacterium"[Tiab] OR "Pseudomonas"[Tiab] OR "Ralstonia"[Tiab] OR "Staphylococcus"[Tiab] OR "Salmonella"[Tiab] OR "Serratia"[Tiab] OR "Stenotrophomonas"[Tiab]                                                                                                                                                                                                                                                                                                                                                                                                                                                                                                                                                                              |

|                                            |                                                                                                                                                                                                                                                                                                                                                                                                                                                                                                                                                                                                                                                                                                                                                                                                                                                                                                                                                                                                                                                                                                                                                                                                                                                                                                                                              |
|--------------------------------------------|----------------------------------------------------------------------------------------------------------------------------------------------------------------------------------------------------------------------------------------------------------------------------------------------------------------------------------------------------------------------------------------------------------------------------------------------------------------------------------------------------------------------------------------------------------------------------------------------------------------------------------------------------------------------------------------------------------------------------------------------------------------------------------------------------------------------------------------------------------------------------------------------------------------------------------------------------------------------------------------------------------------------------------------------------------------------------------------------------------------------------------------------------------------------------------------------------------------------------------------------------------------------------------------------------------------------------------------------|
| Contamination/growth = #6                  | "Contaminant"[Tiab] OR "Contaminated"[Tiab] OR "Contamination"[Tiab] OR "Contaminate"[Tiab] OR "Microbial quality"[Tiab] OR<br>"Microbial contamination"[Tiab] OR "Bacterial contamination"[Tiab] OR "Bacteriological study"[Tiab] OR "Bacteriological<br>examination"[Tiab] OR "Bacteriological culture"[Tiab] OR "growth"[Tiab] OR "bacterial culture"[Tiab] OR "Pseudobacteremia"[Tiab]<br>OR "Pseudo-bacteremia"[Tiab] OR "Pseudobacteraemia"[Tiab] OR "Pseudo-bacteraemia"[Tiab]                                                                                                                                                                                                                                                                                                                                                                                                                                                                                                                                                                                                                                                                                                                                                                                                                                                        |
| Nosocomial infection = #7                  | "Hospital "[Tiab] OR "ward"[Tiab] OR "Nosocomial infection"[Tiab] OR "Cross infection"[Mesh] OR "Cross-infection"[Tiab] OR<br>outbreak*[Tiab] OR "Disease outbreak"[Mesh] OR "Hospital outbreak"[Tiab] OR "Hospital-acquired infection"[Tiab] OR "Hospital<br>acquired infection"[Tiab] OR "Healthcare associated infection"[Tiab] OR "Healthcare-associated infection"[Tiab] OR Sepsis[Mesh] OR<br>"Neonatal sepsis"[Mesh] OR "Septic disease"[Tiab] OR Bacteremia[Mesh] OR Bacteraemia[Tiab] OR "Blood culture"[Mesh] OR<br>"Hemoculture"[Tiab] OR "Blood infection"[Tiab] OR "Bloodstream infection"[Tiab] OR "Healthcare cent*"[Tiab] OR "Hospital<br>associated infection"[Tiab] OR "Surgery infection" OR "Surgical infection"[Tiab] OR "Surgical site infection"[Tiab] OR "Surgical-site<br>infection"[Tiab] OR "Post-surgical infection"[Tiab] OR "Post-surgery infection"[Tiab] OR "Postsurgical infection"[Tiab] OR<br>"Postsurgery infection"[Tiab] OR "Post-surgery infection"[Tiab] OR "Oncology infection"[Tiab] OR "Hematology infection"[Tiab] OR<br>"Haematology infection"[Tiab] OR "Intensive care unit infection"[Tiab] OR "ICU infection"[Tiab] OR "Patient infection"[Tiab] OR<br>"Pediatric infection"[Tiab] OR "Pediatric ward infection"[Tiab] OR "Paediatric infection"[Tiab] OR "Paediatric ward infection"[Tiab] |
| #1 OR #2 OR #3 OR #4 AND #5 AND # 6 AND #7 |                                                                                                                                                                                                                                                                                                                                                                                                                                                                                                                                                                                                                                                                                                                                                                                                                                                                                                                                                                                                                                                                                                                                                                                                                                                                                                                                              |
